# Supplementary material for: Affective and cognitive components of students’ attitudes towards communication learning - validation of the Communication Skills Attitude Scale in a cohort of polish medical students
Source: PubMed Central journal article supplement (PMC8017827; doi:10.1186/s12909-021-02626-7), 2021-04-01
Supplement: 12909_2021_2626_MOESM1_ESM.pdf [file 12909_2021_2626_MOESM1_ESM.pdf]

**Additional file 1. Polish and the original English version of the CSAS scale.**

|                                                                                                                                                                                                                                                                                                                                                                                                                                                                                                                                                                                                                                                                                                                            |                                                                                                                                                                                                                 |   |   |   |   |   |
|----------------------------------------------------------------------------------------------------------------------------------------------------------------------------------------------------------------------------------------------------------------------------------------------------------------------------------------------------------------------------------------------------------------------------------------------------------------------------------------------------------------------------------------------------------------------------------------------------------------------------------------------------------------------------------------------------------------------------|-----------------------------------------------------------------------------------------------------------------------------------------------------------------------------------------------------------------|---|---|---|---|---|
| <p><b>Proszę o zapoznanie się z poniższymi stwierdzeniami dotyczącymi uczenia się umiejętności komunikacyjnych oraz wskazanie odpowiedzi najbardziej pasującej do Państwa opinii zgodnie z następującą skalą:</b></p> <p><b>1 = zdecydowanie się nie zgadzam</b><br/> <b>2 = nie zgadzam się</b><br/> <b>3 = nie mam zdania</b><br/> <b>4 = zgadzam się</b><br/> <b>5 = zdecydowanie się zgadzam</b></p> <p>[Please read the following statements about communication skills learning. Indicate whether you agree or disagree with all of the statements by circling the most appropriate response. Remember,</p> <p>1 = strongly disagree<br/> 2 = disagree<br/> 3 = neutral<br/> 4 = agree<br/> 5 = strongly agree]*</p> |                                                                                                                                                                                                                 |   |   |   |   |   |
| 1                                                                                                                                                                                                                                                                                                                                                                                                                                                                                                                                                                                                                                                                                                                          | <b>Aby być dobrym lekarzem, muszę mieć dobre umiejętności komunikacyjne</b><br>[In order to be a good doctor I must have good communication skills]                                                             | 1 | 2 | 3 | 4 | 5 |
| 2                                                                                                                                                                                                                                                                                                                                                                                                                                                                                                                                                                                                                                                                                                                          | <b>Nie widzę sensu w uczeniu się umiejętności komunikacyjnych</b><br>[I can't see the point in learning communication skills]                                                                                   | 1 | 2 | 3 | 4 | 5 |
| 3                                                                                                                                                                                                                                                                                                                                                                                                                                                                                                                                                                                                                                                                                                                          | <b>Słabe umiejętności komunikacyjne nie stanowią przeszkody w ukończeniu studiów na kierunku lekarskim</b><br>[Nobody is going to fail their medical degree for having poor communication skills]               | 1 | 2 | 3 | 4 | 5 |
| 4                                                                                                                                                                                                                                                                                                                                                                                                                                                                                                                                                                                                                                                                                                                          | <b>Rozwijanie umiejętności komunikacyjnych jest dla mnie tak samo ważne jak rozwijanie wiedzy medycznej</b><br>[Developing my communication skills is just as important as developing my knowledge of medicine] | 1 | 2 | 3 | 4 | 5 |
| 5                                                                                                                                                                                                                                                                                                                                                                                                                                                                                                                                                                                                                                                                                                                          | <b>Uczenie się umiejętności komunikacyjnych pomogło lub pomoże mi odnosić się z szacunkiem do pacjentów</b><br>[Learning communication skills has helped or will help me respect patients]                      | 1 | 2 | 3 | 4 | 5 |
| 6                                                                                                                                                                                                                                                                                                                                                                                                                                                                                                                                                                                                                                                                                                                          | <b>Nie mam czasu, żeby uczyć się umiejętności komunikacyjnych</b><br>[I haven't got time to learn communication skills]                                                                                         | 1 | 2 | 3 | 4 | 5 |
| 7                                                                                                                                                                                                                                                                                                                                                                                                                                                                                                                                                                                                                                                                                                                          | <b>Uczenie się umiejętności komunikacyjnych jest ciekawe</b><br>[Learning communication skills is interesting]                                                                                                  | 1 | 2 | 3 | 4 | 5 |
| 8                                                                                                                                                                                                                                                                                                                                                                                                                                                                                                                                                                                                                                                                                                                          | <b>Nie powinno się mnie zmuszać do przychodzenia na zajęcia dotyczące umiejętności komunikacyjnych</b><br>[I can't be bothered to turn up to sessions on communication skills]                                  | 1 | 2 | 3 | 4 | 5 |
| 9                                                                                                                                                                                                                                                                                                                                                                                                                                                                                                                                                                                                                                                                                                                          | <b>Uczenie się umiejętności komunikacyjnych polepszyło lub polepszy moje umiejętności pracy w zespole</b><br>[Learning communication skills has helped or will help facilitate my team-working skills]          | 1 | 2 | 3 | 4 | 5 |
| 10                                                                                                                                                                                                                                                                                                                                                                                                                                                                                                                                                                                                                                                                                                                         | <b>Uczenie się umiejętności komunikacyjnych poprawiło (lub poprawi) moją umiejętność rozmowy z pacjentami</b><br>[Learning communication skills has improved my ability to communicate with patients]           | 1 | 2 | 3 | 4 | 5 |

|    |                                                                                                                                                                                                                                                                               |   |   |   |   |   |
|----|-------------------------------------------------------------------------------------------------------------------------------------------------------------------------------------------------------------------------------------------------------------------------------|---|---|---|---|---|
| 11 | <b>Zajęcia z umiejętności komunikacyjnych stwierdzają rzeczy oczywiste, a następnie je komplikują</b><br>[Communication skills teaching states the obvious and then complicates it]                                                                                           | 1 | 2 | 3 | 4 | 5 |
| 12 | <b>Uczenie się umiejętności komunikacyjnych to przyjemność</b><br>[Learning communication skills is fun]                                                                                                                                                                      | 1 | 2 | 3 | 4 | 5 |
| 13 | <b>Uczenie się umiejętności komunikacyjnych jest za łatwe</b><br>[Learning communication skills is too easy]                                                                                                                                                                  | 1 | 2 | 3 | 4 | 5 |
| 14 | <b>Uczenie się umiejętności komunikacyjnych pomogło lub pomoże mi odnosić się z szacunkiem do współpracowników</b><br>[Learning communication skills has helped or will help me respect my colleagues]                                                                        | 1 | 2 | 3 | 4 | 5 |
| 15 | <b>Ciężko mi zaufać informacjom odnośnie umiejętności komunikacyjnych udzielnych mi przez osoby niezwiązane z pracą kliniczną</b><br>[I find it difficult to trust information about communication skills given to me by non-clinical lecturers]                              | 1 | 2 | 3 | 4 | 5 |
| 16 | <b>Uczenie się umiejętności komunikacyjnych pomogło lub pomoże mi honorować prawa pacjentów dotyczące poufności i świadomej zgody</b><br>[Learning communication skills has helped or will help me recognise patients' rights regarding confidentiality and informed consent] | 1 | 2 | 3 | 4 | 5 |
| 17 | <b>Zajęcia uczące komunikacji miałyby lepszy wizerunek, gdyby ich nazwa brzmiała w sposób bardziej naukowy</b><br>[Communication skills teaching would have a better image if it sounded more like a science subject]                                                         | 1 | 2 | 3 | 4 | 5 |
| 18 | <b>Starając się o przyjęcie na studia medyczne uznałem, że dobrym pomysłem będzie nauka umiejętności komunikacyjnych</b><br>[When applying for medicine, I thought it was a really good idea to learn communication skills]                                                   | 1 | 2 | 3 | 4 | 5 |
| 19 | <b>Nie potrzebuję dobrych umiejętności komunikacyjnych, aby zostać lekarzem</b><br>[I don't need good communication skills to be a doctor]                                                                                                                                    | 1 | 2 | 3 | 4 | 5 |
| 20 | <b>Trudno mi przyznać się, że mam pewne problemy z moimi umiejętnościami komunikacyjnymi</b><br>[I find it hard to admit to having some problems with my communication skills]                                                                                                | 1 | 2 | 3 | 4 | 5 |
| 21 | <b>Uważam, że uczenie się umiejętności komunikacyjnych w trakcie studiów medycznych jest bardzo przydatne</b><br>[I think it's really useful learning communication skills on the medical degree]                                                                             | 1 | 2 | 3 | 4 | 5 |
| 22 | <b>Umiejętność zdawania egzaminów jest bardziej przydatna do ukończenia studiów medycznych niż umiejętności komunikacyjne</b><br>[My ability to pass exams will get me through medical school rather than my ability to communicate]                                          | 1 | 2 | 3 | 4 | 5 |
| 23 | <b>Uczenie się umiejętności komunikacyjnych ma zastosowanie w nauce medycyny</b><br>[Learning communication skills is applicable to learning medicine]                                                                                                                        | 1 | 2 | 3 | 4 | 5 |
| 24 | <b>Ciężko mi traktować na poważnie uczenie się umiejętności komunikacyjnych</b><br>[I find it difficult to take communication skills learning seriously]                                                                                                                      | 1 | 2 | 3 | 4 | 5 |

|                                                                                                                                                                                                                                                                                                                                               |                                                                                                                                                                                                             |   |   |   |   |   |
|-----------------------------------------------------------------------------------------------------------------------------------------------------------------------------------------------------------------------------------------------------------------------------------------------------------------------------------------------|-------------------------------------------------------------------------------------------------------------------------------------------------------------------------------------------------------------|---|---|---|---|---|
| 25                                                                                                                                                                                                                                                                                                                                            | <b>Uczenie się umiejętności komunikacyjnych jest ważne, ponieważ są to umiejętności na całe życie</b><br>[Learning communication skills is important because my ability to communicate is a lifelong skill] | 1 | 2 | 3 | 4 | 5 |
| 26                                                                                                                                                                                                                                                                                                                                            | <b>Uczenie się komunikacji powinno być zostawione studentom psychologii, a nie medycyny</b><br>[Communication skills learning should be left to psychology students, not medical students]                  | 1 | 2 | 3 | 4 | 5 |
| Opracowano w oparciu o [ <i>Developed on the basis of</i> ]: Rees C, Sheard C, Davies S. The development of a scale to measure medical students' attitudes towards communication skills learning: the Communication Skills Attitude Scale (CSAS). <i>Medical Education</i> . 2002; 36(2):141-7. John Wiley and Sons (© Blackwell Science Ltd) |                                                                                                                                                                                                             |   |   |   |   |   |

\*Polish version of the CSAS is presented in bold font. The original English version of the CSAS is given in square brackets.
